# Supplementary material
Source: ML conference proceedings conference paper supplement (https://openaccess.thecvf.com/content/cvpr_2017/html/Bagherinezhad_LCNN_Lookup-Based_Convolutional_2017_CVPR_paper.html)
Supplement: Supplementary file 1 [file Bagherinezhad_LCNN_Lookup-Based_Convolutional_2017_CVPR_supplemental.pdf]

# LCNN: Lookup-based Convolutional Neural Network

## –Supplementary Material–

### 1. Layer-wise speedup

In this section we compare the layer-wise speedup of LCNN with the baselines. In AlexNet most of the computation is done in the early layers, where the input size is still large. Table 1 shows the percentage of the computation in each layer of AlexNet and the speedup gain of each model on each layer. XNOR-Net [1] gets 32× speedup on 32-bit machines, and it can be higher for 64-bit or 128-bit machines. However, since they don’t binarize the first layer, where 9.29% of computation is done, their speedup is bounded by  $\frac{1}{9.29\%} = 10.8\times$ . This is still much lower than LCNN-fast speedup, which gets about the same accuracy. Wen *et al.* [2] gets good speedup on conv2-5, yet their speedup is much lower on the first layer. We think this is because they’re sparsifying the convolution tensors. The convolution tensor in the first layer cannot become very sparse as they are performing on the input itself, which has only 3 channels. LCNN-accurate, however, is speeding up the first layer by representing the convolution tensor by a sparse combination of a set of vectors. This allows a more compact representation, and therefore larger speedup in that layer.

### 2. Few-example trials

We do the few-example experiment under two settings: 1) Try 5 random samplings of 10 random categories for few-example training and report the average over all. 2) Set aside all cats (7 categories), bicycles (2 categories) and sofa (1 category). For the latter setting, the following categories are excluded:

- 1- n02123045 tabby.n.01
- 2- n02123159 tiger\_cat.n.02
- 3- n02123394 persian\_cat.n.01
- 4- n02123597 siamese\_cat.n.01
- 5- n02124075 egyptian\_cat.n.01
- 6- n02125311 cougar.n.01
- 7- n02127052 lynx.n.02
- 8- n02835271 bicycle-built-for-two.n.01
- 9- n03792782 mountain\_bike.n.01
- 10- n04344873 studio\_couch.n.01

The first 7 categories are cats, categories 8 and 9 are bicycles, and category 10 is a sofa.

In each of the trials, we repeat the random sampling of the few examples (1, 2 or 4 examples) 20 times. We evaluate the performance of LCNN and CNN on each random sampling and get the average over all. Figure 1 shows the categories that have been excluded and the performance of LCNN and the CNN baseline in each trial. Notably, LCNN is consistently getting higher accuracy in all trials.

### References

[1] M. Rastegari, V. Ordonez, J. Redmon, and A. Farhadi. Xnor-net: Imagenet classification using binary convolutional neural networks. In *ECCV*, 2016. 1

[2] W. Wen, C. Wu, Y. Wang, Y. Chen, and H. Li. Learning structured sparsity in deep neural networks. In *NIPS*, 2016. 1

| AlexNet               | conv1  | conv2  | conv3  | conv4  | conv5  | fc6   | fc7   | fc8   | overall |
|-----------------------|--------|--------|--------|--------|--------|-------|-------|-------|---------|
| computation %         | 9.29%  | 39.45% | 13.17% | 19.76% | 13.17% | 3.33% | 1.48% | 0.36% | 100%    |
| Wen <i>et al.</i> [2] | 1.05×  | 3.37×  | 6.27×  | 9.73×  | 4.93×  | 1×    | 1×    | 1×    | 3.1×    |
| XNOR-Net [1]          | 1×     | 32×    | 32×    | 32×    | 32×    | 32×   | 32×   | 1×    | 8.0×    |
| LCNN-fast             | 16.66× | 80.24× | 83.23× | 75.47× | 61.99× | 7.73× | 7.91× | 1×    | 37.6×   |
| LCNN-accurate         | 6.97×  | 2.57×  | 3.51×  | 3.75×  | 3.21×  | 3.14× | 3.83× | 1×    | 3.2×    |

Table 1. Comparing the layer-wise speedup of each model on AlexNet. The accuracy of each model is reported in the paper.

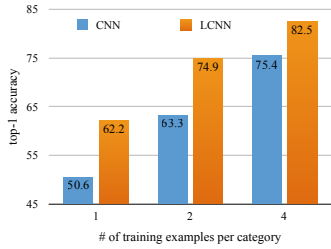

(a) Trial #1 categories:

- 1- n01514859 hen.n.02
- 2- n01773549 barn\_spider.n.01
- 3- n01978287 dungeness\_crab.n.02
- 4- n02099429 curly-coated\_retriever.n.01
- 5- n02669723 academic\_gown.n.01
- 6- n03888257 parachute.n.01
- 7- n03995372 power\_drill.n.01
- 8- n04005630 prison.n.01
- 9- n04467665 trailer\_truck.n.01
- 10- n13133613 ear.n.05

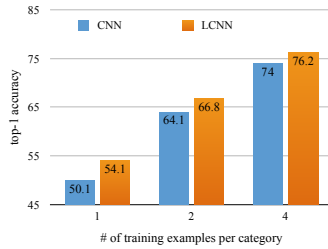

(b) Trial #2 categories:

- 1- n01983481 american\_lobster.n.02
- 2- n02091467 norwegian\_elkhound.n.01
- 3- n02444819 otter.n.02
- 4- n02607072 anemone\_fish.n.01
- 5- n02817516 bearskin.n.02
- 6- n02879718 bow.n.04
- 7- n03530642 honeycomb.n.02
- 8- n03908618 pencil\_box.n.01
- 9- n04286575 spotlight.n.02
- 10- n04554684 washer.n.03

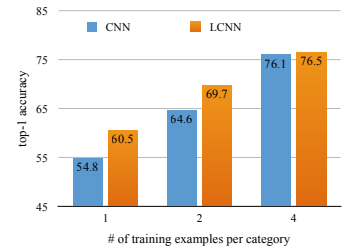

(c) Trial #3 categories:

- 1- n02110063 malamute.n.01
- 2- n02111277 newfoundland.n.01
- 3- n03724870 mask.n.01
- 4- n03775546 mixing\_bowl.n.01
- 5- n03782006 monitor.n.05
- 6- n03929660 pick.n.05
- 7- n04201297 shoji.n.01
- 8- n04487081 trolleybus.n.01
- 9- n07753113 fig.n.04
- 10- n07930864 cup.n.06

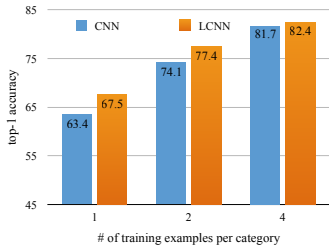

(d) Trial #4 categories:

- 1- n01669191 box\_turtle.n.01
- 2- n01773157 black\_and\_gold\_garden\_spider.n.01
- 3- n02106662 german\_shepherd.n.01
- 4- n03733131 maypole.n.01
- 5- n03929855 pickelhaube.n.01
- 6- n04116512 rubber\_eraser.n.01
- 7- n04389033 tank.n.01
- 8- n04590129 window\_shade.n.01
- 9- n04592741 wing.n.02
- 10- n07836838 chocolate\_sauce.n.01

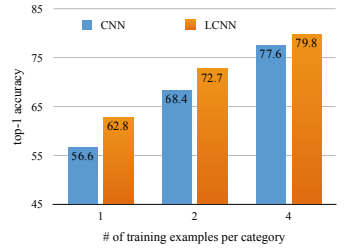

(e) Trial #5 categories:

- 1- n01774384 black\_widow.n.01
- 2- n02090379 redbone.n.01
- 3- n02113023 pembroke.n.01
- 4- n02138441 meerkat.n.01
- 5- n02444819 otter.n.02
- 6- n02917067 bullet\_train.n.01
- 7- n03016953 chiffonier.n.01
- 8- n03180011 desktop\_computer.n.01
- 9- n03207941 dishwasher.n.01
- 10- n03476684 hair\_slide.n.01

Figure 1. Comparing LCNN and standard CNN on few-example training. LCNN beats standard CNN in all samplings.
